# Supplementary material for: Real-World Study on Effectiveness of Molnupiravir and Nirmatrelvir–Ritonavir in Unvaccinated Patients with Chronic Respiratory Diseases with Confirmed SARS-CoV-2 Infection Managed in Out-Patient Setting
Source: MDPI journal article supplement (doi:10.3390/v15030610), 2023-02-23
Supplement: s1 [file s1]

## Supplementary file

**Table S1.** Demographic and clinical characteristics of included patients.

| Variable <sup>a</sup>                    | No anti-viral treatment<br>(n = 2387) | NMV-r or MOV<br>(n = 880) | p-value |
|------------------------------------------|---------------------------------------|---------------------------|---------|
| Age (years), Median [IQR]                | 82 [73 – 89]                          | 83 [73 – 89]              | 0.046   |
| Male                                     | 1762 (73.8%)                          | 579 (65.8%)               | <0.001  |
| Ethnic group                             |                                       |                           |         |
| Chinese                                  | 2363 (99.0%)                          | 873 (99.2%)               | 0.802   |
| Caucasian                                | 4 (0.2%)                              | 0 (0%)                    |         |
| Southeast Asian                          | 6 (0.3%)                              | 2 (0.2%)                  |         |
| South Asian                              | 9 (0.4%)                              | 3 (0.3%)                  |         |
| Japanese                                 | 1 (0%)                                | 1 (0.1%)                  |         |
| Others                                   | 4 (0.2%)                              | 1 (0.1%)                  |         |
| Respiratory diseases                     |                                       |                           | <0.001  |
| Asthma                                   | 474 (19.9%)                           | 211 (24.0%)               |         |
| Bronchiectasis                           | 358 (15.0%)                           | 157 (18.1%)               |         |
| COPD                                     | 1555 (65.1%)                          | 510 (58.0%)               |         |
| CCI, Median [IQR]                        | 1 [1-2]                               | 0 [0-1]                   | 0.003   |
| Medication                               |                                       |                           |         |
| Statin                                   | 1040 (43.6%)                          | 436 (49.5%)               | 0.002   |
| Anti-epileptic                           | 28 (1.2%)                             | 13 (1.5%)                 | 0.488   |
| DOACs                                    | 191 (8.0%)                            | 67 (7.6%)                 | 0.715   |
| Calcium channel blocker                  | 1294 (54.2%)                          | 497 (56.5)                | 0.248   |
| Baseline blood test, Median [IQR]        |                                       |                           |         |
| Leucocyte count <sup>b</sup>             | 6.08 [4.90 – 7.38]                    | 6.01 [4.91 – 7.40]        | 0.437   |
| Neutrophil count <sup>b</sup>            | 3.86 [2.93 – 4.92]                    | 3.90 [3.07 – 4.93]        | 0.448   |
| Lymphocyte count <sup>b</sup>            | 0.82 [0.50 – 1.32]                    | 0.94 [0.58 – 1.47]        | 0.046   |
| Eosinophil count <sup>b</sup>            | 0.04 [0.00 – 0.14]                    | 0.05 [0.00 – 0.14]        | 0.210   |
| Estimated GFR, mL/min/1.73m <sup>2</sup> | 58.2 [40.5 – 77.0]                    | 59.6 [38.8 – 77.0]        | 0.360   |
| ALT (unit/L)                             | 12.0 [8.0 – 16.6]                     | 12.9 [8.8 – 18.0]         | 0.107   |
| COVID-related outcomes                   |                                       |                           |         |
| Hospitalization                          | 228 (9.6%)                            | 59 (6.7%)                 | 0.011   |
| Respiratory failure                      | 209 (8.8%)                            | 36 (4.1%)                 | 0.068   |
| Severe respiratory failure               | 91 (3.8%)                             | 19 (2.2%)                 | 0.020   |
| Mortality                                | 120 (5.0%)                            | 19 (2.2%)                 | <0.001  |
| Length of stay (days), Median [IQR]      | 9 [4-16]                              | 9 [3-21]                  | 0.135   |

ALT, Alanine aminotransferase; CCI, Charlson co-morbidity index; COPD, Chronic obstructive pulmonary disease; DOACs, direct-acting oral anticoagulants; GFR, glomerular filtration rate; IQR, interquartile range; MOV, Molnupiravir; m, Meter; min, minute; mL, millilitre; NMV-r, nirmatrelvir-ritonavir; continuous variables are compared by unpaired t-test for continuous variables, categorical variables are compared by  $\chi^2$  test

**Table S2.** Risk ratio (RR) for disease outcomes in univariate and multivariate log-binomial regression

| COVID-related outcomes     | No. of patients (% in group)          |                    |                  | RR (95% CI) <sup>#</sup><br>(Compared with no treatment) |                               | Adjusted RR (95% CI) <sup>a#</sup><br>(Compared with no treatment) |                                |
|----------------------------|---------------------------------------|--------------------|------------------|----------------------------------------------------------|-------------------------------|--------------------------------------------------------------------|--------------------------------|
|                            | No anti-viral treatment<br>(n = 2387) | NMV-r<br>(n = 302) | MOV<br>(n = 578) | NMV-r                                                    | MOV                           | NMV-r                                                              | MOV                            |
| Hospitalization            | 228 (9.6%)                            | 15 (5.0%)          | 44 (7.6%)        | 0.52 (0.31 – 0.87)<br>p=0.01*                            | 0.80 (0.59 – 1.09)<br>p=0.15  | 0.56 (0.31 – 1.02)<br>p=0.06                                       | 0.78 (0.55 – 1.11)<br>p=0.16   |
| Respiratory failure        | 209 (8.8%)                            | 10 (3.3%)          | 40 (6.9%)        | 0.38 (0.20 – 0.71)<br>p <0.01*                           | 0.79 (0.57 – 1.10)<br>p=0.16  | 0.33 (0.15 – 0.74)<br>p <0.01*                                     | 0.74 (0.51 – 1.06)<br>p=0.10   |
| Severe respiratory failure | 91 (3.8%)                             | 3 (1.0%)           | 16 (2.8%)        | 0.26 (0.08 – 0.82)<br>p=0.02*                            | 0.73 (0.43 – 1.23)<br>p=0.23  | 0.23 (0.06 – 0.93)<br>p=0.04*                                      | 0.52 (0.27 – 0.99)<br>p=0.048* |
| Mortality                  | 120 (5.0%)                            | 4 (1.3%)           | 15 (2.6%)        | 0.26 (0.01 – 0.71)<br>p=0.008*                           | 0.52 (0.30 – 0.88)<br>p=0.01* | 0.37 (0.14 – 1.01)<br>p=0.051                                      | 0.42 (0.23 – 0.77)<br>p<0.01*  |

\*p <0.05 indicated by box shading.

CI, Confidence interval; MOV, Molnupiravir; NMV-r, nirmatrelvir-ritonavir; RR, Risk ratio

<sup>a</sup>Adjusted for age, gender, underlying respiratory disease, baseline estimated glomerular filtration rate, and Charlson co-morbidity index.

Boxes highlighted in blue represent statistical significant findings

**Table S3.** Odds ratio (OR) for disease outcomes in univariate and multivariate logistic regression in sensitivity analysis

| COVID-related outcomes     | No. of patients (% in group)          |                    |                  | OR (95% CI)<br>(Compared with no treatment) |                               | Adjusted OR (95% CI) <sup>a</sup><br>(Compared with no treatment) |                               |
|----------------------------|---------------------------------------|--------------------|------------------|---------------------------------------------|-------------------------------|-------------------------------------------------------------------|-------------------------------|
|                            | No anti-viral treatment<br>(n = 2387) | NMV-r<br>(n = 302) | MOV<br>(n = 578) | NMV-r                                       | MOV                           | NMV-r                                                             | MOV                           |
| Hospitalization            | 228 (9.6%)                            | 15 (5.0%)          | 44 (7.6%)        | 0.50 (0.29 – 0.85)<br>p=0.01*               | 0.78 (0.56 – 1.09)<br>p=0.15  | 0.54 (0.28 – 1.01)<br>p=0.05                                      | 0.76 (0.52 – 1.12)<br>p=0.16  |
| Respiratory failure        | 209 (8.8%)                            | 10 (3.3%)          | 40 (6.9%)        | 0.45 (0.22 – 0.93)<br>p=0.03*               | 0.84 (0.56 – 1.28)<br>p=0.42  | 0.31 (0.14 – 0.71)<br>p <0.01*                                    | 0.72 (0.48 – 1.07)<br>p=0.10  |
| Severe respiratory failure | 91 (3.8%)                             | 3 (1.0%)           | 16 (2.8%)        | 0.25 (0.08 – 0.81)<br>p=0.02*               | 0.72 (0.42 – 1.23)<br>p=0.23  | 0.22 (0.05 – 0.91)<br>p=0.04*                                     | 0.51 (0.26 – 0.99)<br>p=0.05* |
| Mortality                  | 120 (5.0%)                            | 4 (1.3%)           | 15 (2.6%)        | 0.25 (0.09 – 0.69)<br>p <0.01*              | 0.50 (0.29 – 0.87)<br>p=0.01* | 0.36 (0.13– 0.99)<br>p=0.05*                                      | 0.40 (0.21 – 0.76)<br>p<0.01* |

\*p <0.05 indicated by box shading CI, Confidence interval; MOV, Molnupiravir; NMV-r, nirmatrelvir-ritonavir; OR, Odds ratio

<sup>a</sup>Adjusted for age, gender, underlying respiratory disease, baseline estimated glomerular filtration rate, and Charlson co-morbidity index.

Boxes highlighted in blue represent statistical significant findings

**Table S4.** Anti-viral effectiveness in subgroup as measured by adjusted odds ratios with logistic regression in sensitivity analysis

| COVID-related outcomes     | No. of patients (% in group)          |                    |                  | Anti-viral effectiveness (95% CI)<br>(Compared with no treatment) |                                  |
|----------------------------|---------------------------------------|--------------------|------------------|-------------------------------------------------------------------|----------------------------------|
|                            | No anti-viral treatment<br>(n = 2387) | NMV-r<br>(n = 302) | MOV<br>(n = 578) | NMV-r                                                             | MOV                              |
| Hospitalization            | 228 (9.6%)                            | 15 (5.0%)          | 44 (7.6%)        | 46.5% (-0.8 – 71.6%)<br>p=0.053                                   | 23.7% (-11.6 – 47.9%)<br>p=0.163 |
| Respiratory failure        | 209 (8.8%)                            | 10 (3.3%)          | 40 (6.9%)        | 69.1% (28.9 – 86.5%)<br>p=0.006*                                  | 28.5% (-6.7 – 52.1%)<br>p=0.101  |
| Severe respiratory failure | 91 (3.8%)                             | 3 (1.0%)           | 16 (2.8%)        | 77.9% (8.8 – 94.6%)<br>p=0.037*                                   | 49.2% (0.8 – 74.0%)<br>p=0.047*  |
| Mortality                  | 120 (5.0%)                            | 4 (1.3%)           | 15 (2.6%)        | 64.2% (1.1 – 87.0%)<br>p=0.048*                                   | 59.9% (24.5 – 78.7%)<br>p=0.005* |

\*p <0.05 indicated by box shading.

CI, Confidence interval; MOV, Molnupiravir; NMV-r, nirmatrelvir-ritonavir

Anti-viral effectiveness was calculated the formula, (1-adjusted odds ratio) x 100. The odd ratios were adjusted for age, gender underlying respiratory disease and Charlson co-morbidity index.

Boxes highlighted in blue represent statistical significant findings
